# Supplementary material for: Regulation of polysulfide adsorption and LiF-rich interface chemistry to achieve high-performance PEO-based lithium–sulfur batteries
Source: Royal Society of Chemistry journal article supplement (doi:10.1039/d3ta03497f), 2023-01-01
Supplement: d3ta03497f1.pdf [file d3ta03497f1.pdf]

## Supporting Information

### Regulation of Polysulfide Adsorption and LiF-rich Interface Chemistry to Achieve High-performance PEO-based Lithium-Sulfur Battery

Huanhuan Duan <sup>a</sup>, Leiping Liao <sup>a</sup>, Ran Bi <sup>a</sup>, Yuanfu Deng <sup>a,b,\*</sup>, Guohua Chen <sup>c</sup>

<sup>a</sup> *Guangdong Provincial Key Laboratory of Fuel Cell Technology, School of Chemistry and Chemical Engineering, South China University of Technology, Guangzhou, 510640, Peoples R China;*

<sup>b</sup> *Guangdong Provincial Research Center of Electrochemical Energy Engineering, South China University of Technology, Guangzhou, 510640, Peoples R China;*

<sup>c</sup> *School of Energy and Environment, City University of Hong Kong, Tat Chee Avenue, Kowloon, Hong Kong, Peoples R China.*

#### **Corresponding author.**

*E-mail address:* chyfdeng@scut.edu.cn (Y.F. Deng).

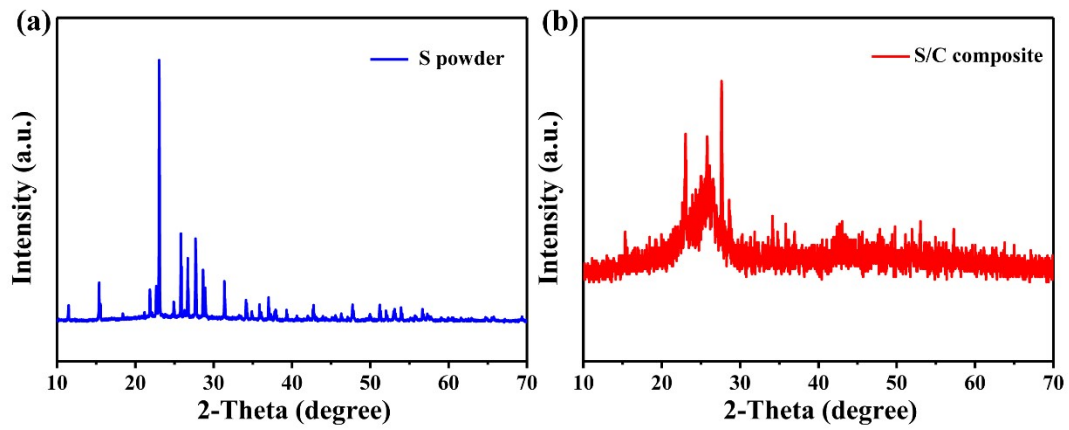

**Figure S1.** XRD curves of (a) S powder and (b) S/C composite.

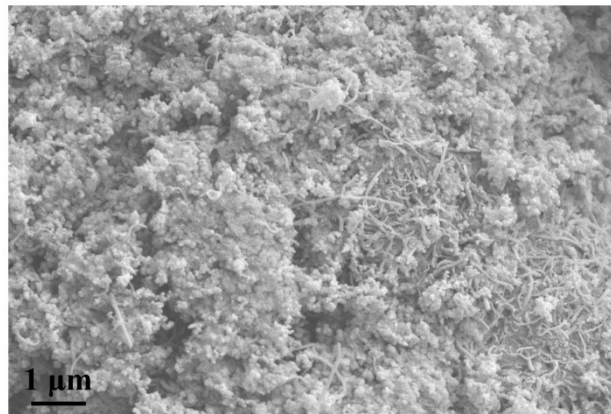

**Figure S2.** SEM image of S/C composite.

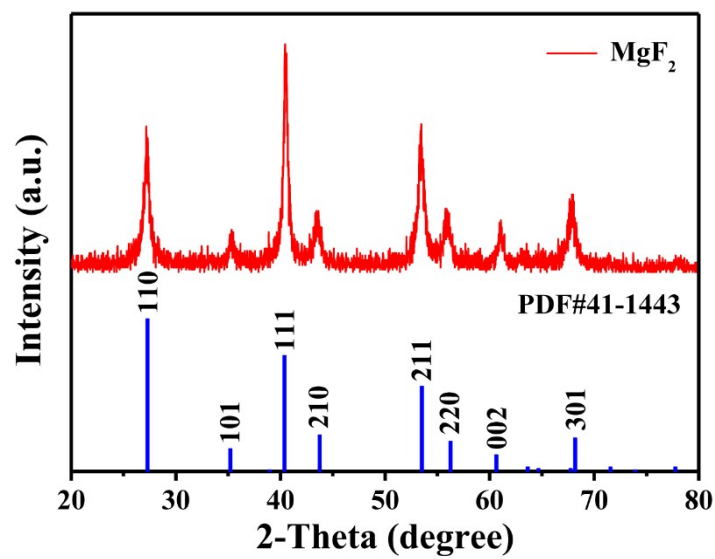

**Figure S3.** The XRD pattern of MgF<sub>2</sub> nanoparticles and corresponding crystal planes.

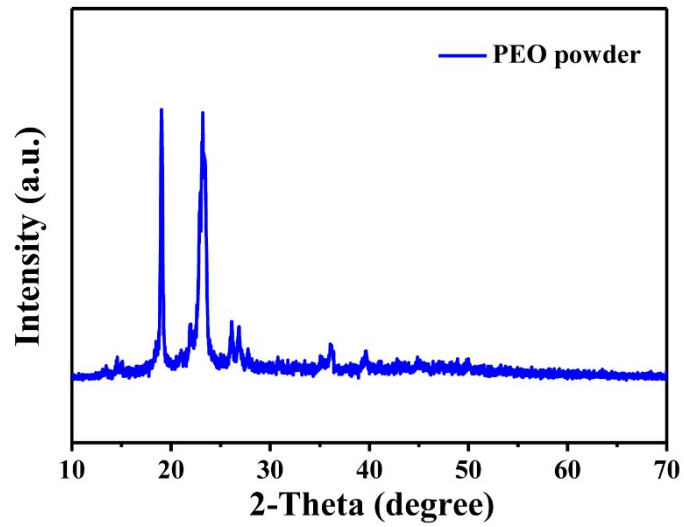

Figure S4. XRD curve of PEO powder.

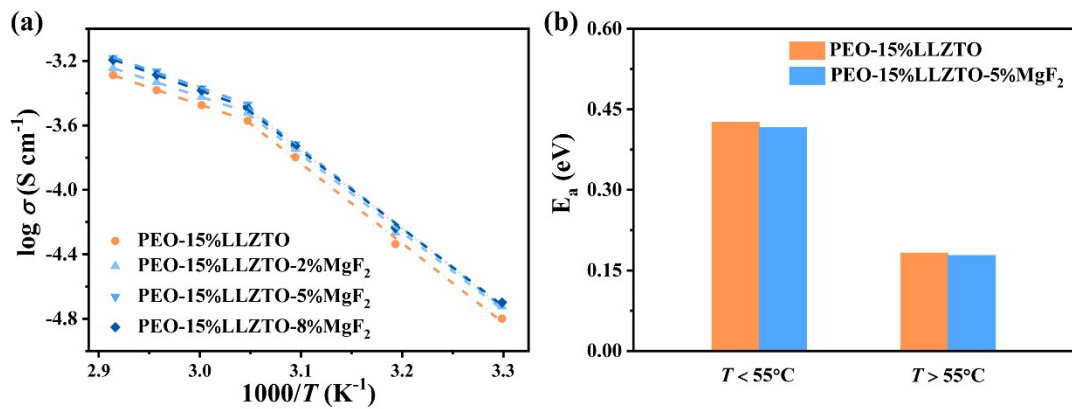

Figure S5. (a) Ionic conductivities for the PEO-15%LLZTO- $x\%$ MgF<sub>2</sub> ( $x = 0, 2, 5,$  and  $8$ ) SSEs; (b) The activation energy calculated from the ionic conductivity curves of PEO-15%LLZTO and PEO-15%LLZTO-5%MgF<sub>2</sub> SSEs at different sections ( $30 - 55^\circ\text{C}$  and  $55 - 70^\circ\text{C}$ ).

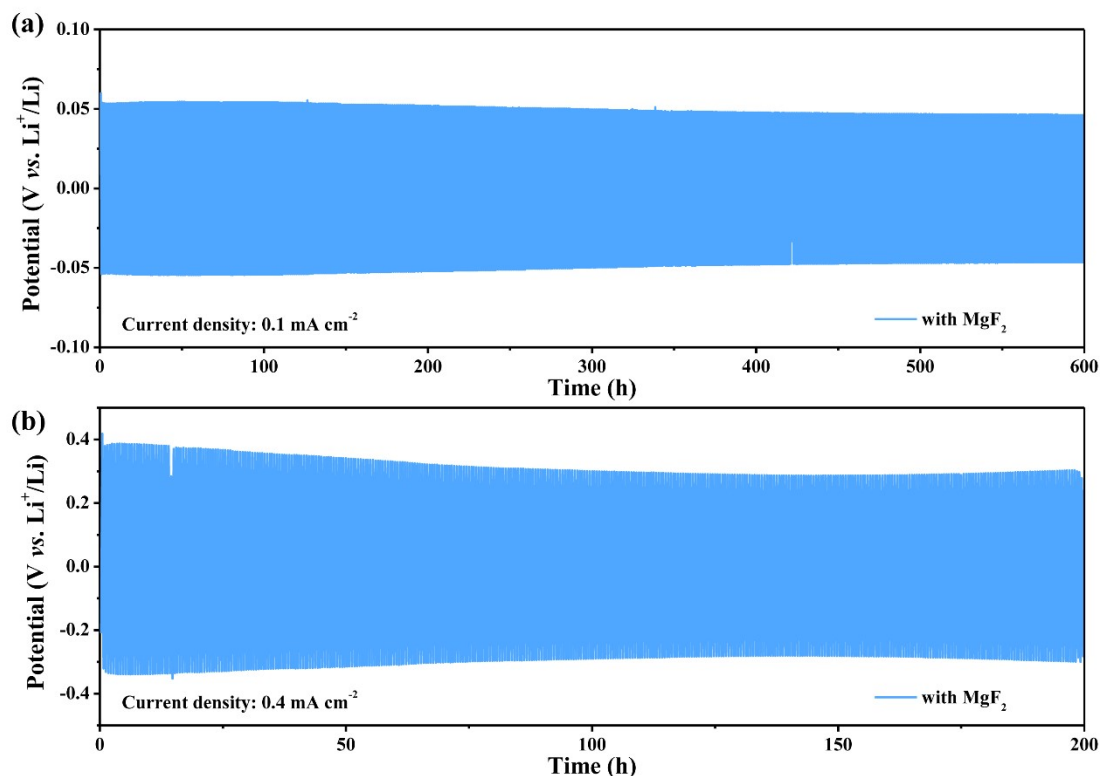

**Figure S6.** The electrochemical performances of Li/Li symmetrical batteries with the PEO-15%LLZTO-5% $\text{MgF}_2$  SSE at  $50^\circ\text{C}$  with current densities of (a)  $0.1 \text{ mA cm}^{-2}$  and (b)  $0.4 \text{ mA cm}^{-2}$ .

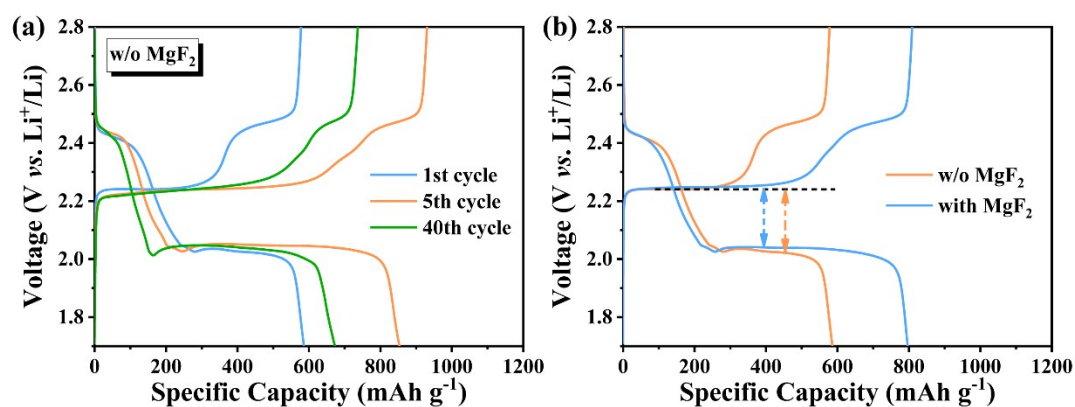

**Figure S7.** (a) The charge-discharge curves of the ASSLSB with the PEO-15%LLZTO SSE under  $50^\circ\text{C}$  at  $0.05 \text{ C}$ ; (b) Comparisons of the charge-discharge curves for the ASSLSBs assembled by the SSEs with or without the  $\text{MgF}_2$  additive under  $50^\circ\text{C}$  at  $0.05 \text{ C}$ .

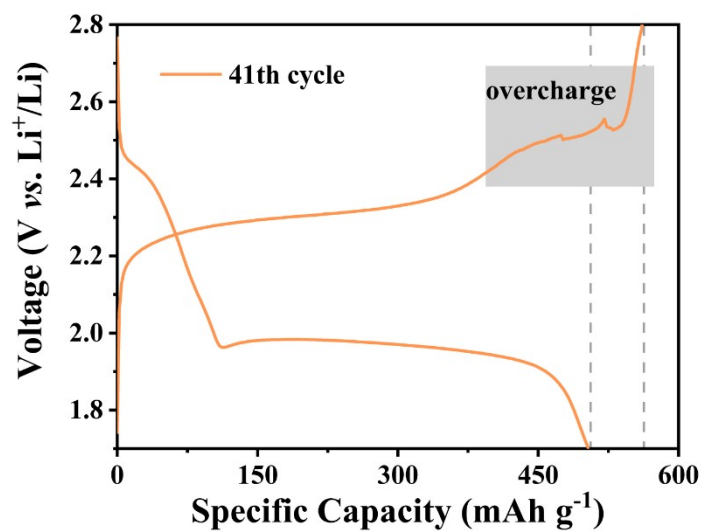

**Figure S8.** The charge-discharge curves of the ASSLSB with the PEO-15%LLZTO SSE under 60°C at a current density of 0.2 C.

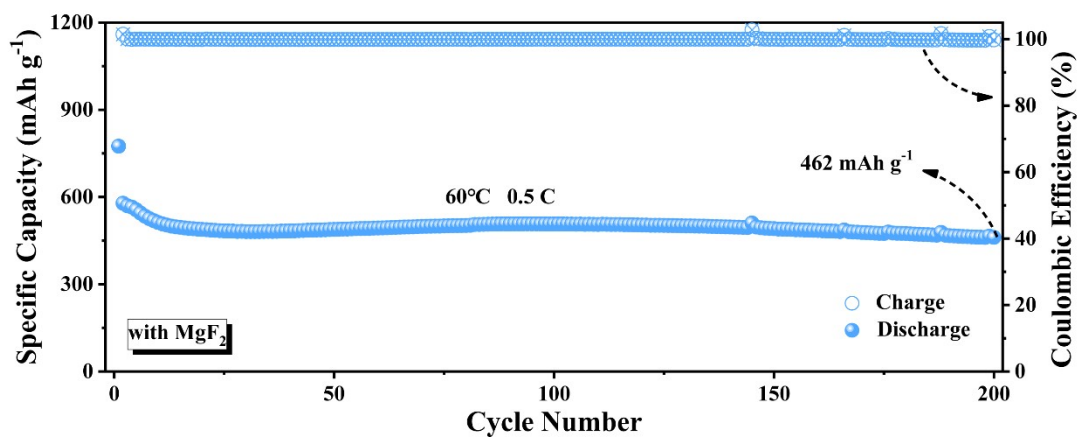

**Figure S9.** Long-term cycle performance of ASSLSBs with the PEO-15%LLZTO-5%MgF<sub>2</sub> SSE under 60°C at 0.5 C.

**Table S1.** Electrochemical performances of lithium-sulfur batteries with PEO-based solid-state electrolytes.

| Cathode                                                | S loading / mg cm <sup>-2</sup> | S content / % | Electrolyte                                 | T / °C | Current density | Capacity / mAh g <sup>-1</sup> (cycle number) | Retention rate / % | Coulombic efficiency / % | Ref. |
|--------------------------------------------------------|---------------------------------|---------------|---------------------------------------------|--------|-----------------|-----------------------------------------------|--------------------|--------------------------|------|
| S@CTT/MXene                                            | 0.6                             | 25            | PEO-LiTFSI-PE                               | 55     | 0.12 C          | 584 (100)                                     | —                  | —                        | 1    |
| S-CNTs                                                 | 0.28                            | 42            | Al <sub>2</sub> O <sub>3</sub> modified PEO | 60     | 0.1 C           | 640 (120)                                     | 45.2               | 98.0                     | 2    |
|                                                        |                                 |               |                                             |        | 0.2 C           | 780 (100)                                     | 82.5               | 98.9                     |      |
| S/BC                                                   | 1.2                             | 48            | PEO/PGA-LiTFSI-Py <sub>13</sub> TFSI        | 50     | 0.2 C           | 541 (100)                                     | 89                 | —                        | 3    |
| S-super P-PEO/LiTFSI                                   | 0.6                             | 40            | C-S-E/4000k                                 | 55     | 0.2 C           | 768 (100)                                     | 83                 | 98.0                     | 4    |
| S/BP-2000                                              | —                               | —             | PEO-PAN-LiTFSI                              | 70     | 0.1 C           | 766 (75)                                      | 61.8               | ~100.0                   | 5    |
| Li <sub>2</sub> S@TiS <sub>2</sub> -super P-PEO/LiTFSI | 0.2-1.2                         | —             | PI@PEO/LiTFSI                               | 80     | 0.8 C           | 333 (150)                                     | 68                 | 98.6                     | 6    |
| Li <sub>2</sub> S@AQT-PEO/LiTFSI                       | 0.2-0.7                         | —             | PE@PEO/LiTFSI                               | 60     | 0.1 C           | 878 (30)                                      | 87.9               | 98.9                     | 7    |

|                         |      |    |                                         |    |         |           |       |      |              |
|-------------------------|------|----|-----------------------------------------|----|---------|-----------|-------|------|--------------|
| S/KB                    | 0.5  | 56 | PEO-LiTFSI-LLZTO<br>with CGS interlayer | 60 | 0.2 C   | 799 (50)  | 95.9  | 85.0 | 8            |
|                         |      |    |                                         | 45 |         | 440 (50)  | 136.6 | 97.1 |              |
| S                       | 0.41 | 70 | PEO-LiTFSI-LLZTO                        | 55 | ~0.07 C | 168 (50)  | 35    | 90.5 | 9            |
|                         |      |    |                                         | 65 |         | 106 (50)  | ~10   | 89.7 |              |
|                         |      |    |                                         | 75 |         | 117 (50)  | ~10   | 88.6 |              |
| S-KB-CNT-<br>PEO/LiTFSI | 0.5  | 50 | PFA PEO                                 | 60 | ~0.06 C | 627 (100) | 53.6  | 98.0 | 10           |
| S/KB-CB-CNT             | 0.5  | 45 | PEO-LLZTO-<br>5%MgF <sub>2</sub>        | 50 | 0.05 C  | 874 (40)  | 90    | 98.5 | This<br>work |
|                         |      |    |                                         | 60 | 0.2 C   | 780 (40)  | 98    | 99.7 |              |
|                         |      |    |                                         | 60 | 0.2 C   | 732 (60)  | 92    | 98.3 |              |

Note: for the cathode with S as active material, 1 C = 1675 mA g<sup>-1</sup>; for the cathode with Li<sub>2</sub>S as active material, 1 C = 1166 mA g<sup>-1</sup>. “—” indicates that the data is not given.

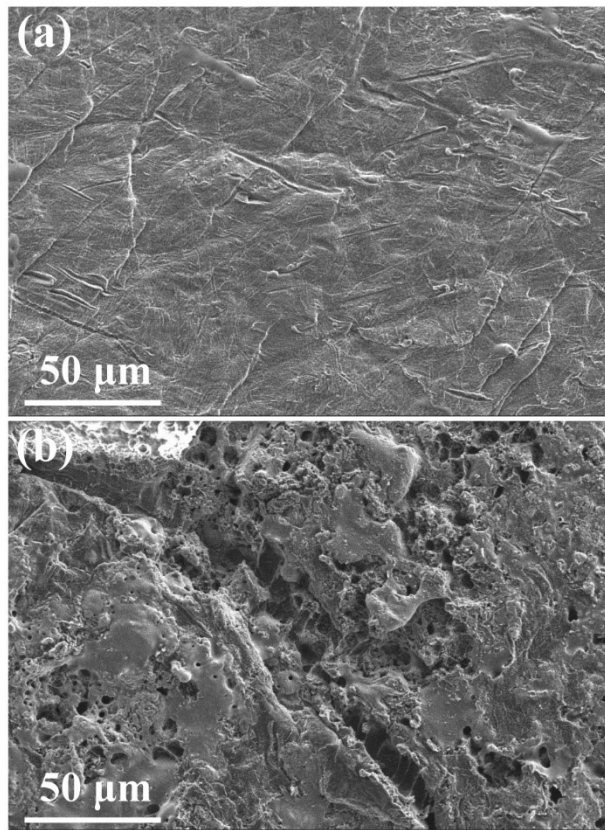

**Figure S10.** (a) SEM image of the cycled lithium metal surface from the battery with the PEO-15%LLZTO-5%MgF<sub>2</sub> SSE; (b) SEM image of cycled lithium metal surface from the battery with the PEO-15%LLZTO SSE.



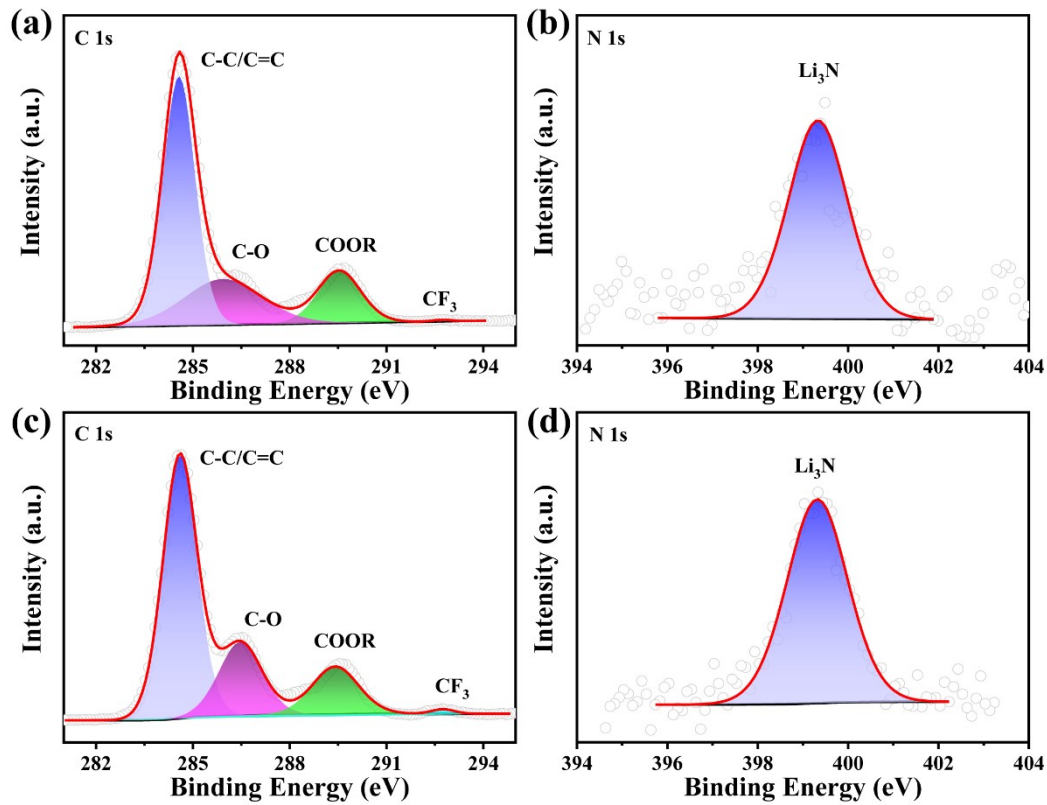

**Figure S11.** XPS spectra of the cycled lithium metal surface from the battery with the PEO-15%LLZTO-5%MgF<sub>2</sub> SSE: (a) C 1s; (b) N 1s; and those with PEO-15%LLZTO SSE: (c) C 1s; (d) N 1s.

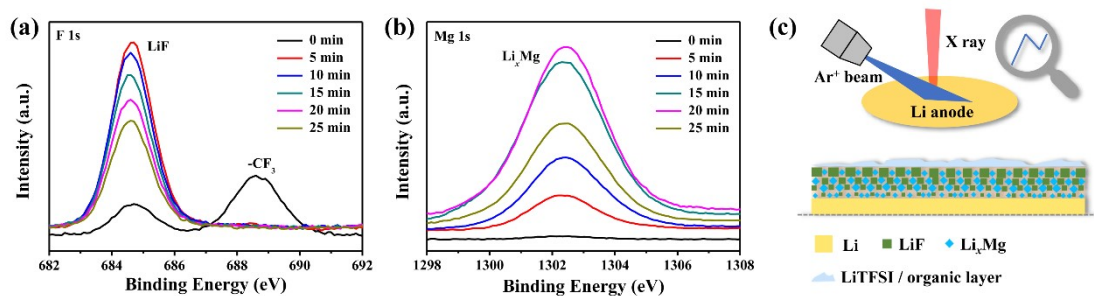

**Figure S12.** Comparison of XPS spectra of (a) F 1s and (b) Mg 1s before and after sputtering under the same conditions (Ar<sup>+</sup>, 5 keV, 3 mm×3 mm); (c) The schematics of Ar<sup>+</sup> sputtering process and SEI model (The LiF and Li<sub>x</sub>Mg alloy layers are used as the main components; other components such as lithium sulfide and lithium nitride are not considered here).

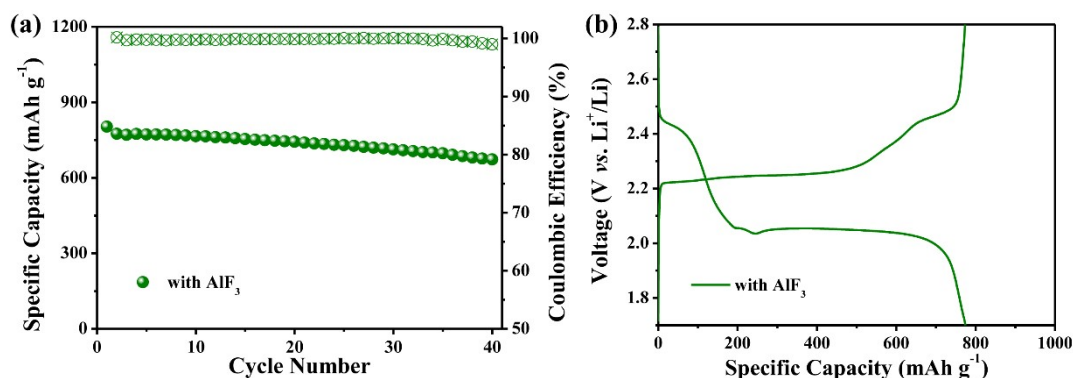

**Figure S13.** (a) Cycle performance and (b) the corresponding charge-discharge curves of the ASSLSB with the PEO-15%LLZTO-5%AlF<sub>3</sub> SSE under 60°C at a current density of 0.2 C.

We used the same method to prepare the solid-state electrolyte (denoted as PEO-15%LLZTO-5%AlF<sub>3</sub>) using AlF<sub>3</sub> as an additive. The ASSLSB's electrochemical performance at 0.2 C and 60°C is investigated. As shown in **Figure S13a**, the ASSLSB shows a high discharge specific capacity of 812 mAh g<sup>-1</sup>, accompanied by a high Coulombic efficiency of about 100%. In addition, this battery also has a lower polarization voltage of 0.20 V (**Figure S13b**). As we expected, the AlF<sub>3</sub> additive shows a similar effect on modifying the PEO-based electrolyte with MgF<sub>2</sub>, due to their similar properties.

## References:

- 1 Y. Zhang, Y. Wu, Y. Liu and J. Feng, *Chem. Eng. J.*, 2022, **428**, 131040.
- 2 Y. Shi, Z. Fan, B. Ding, Z. Li, Q. Lin, S. Chen, H. Dou and X. Zhang, *J. Electroanal. Chem.*, 2021, **881**, 114916.
- 3 J. Li, H. Zhang, Y. Cui, H. Da, H. Wu, Y. Cai and S. Zhang, *Chem. Eng. J.*, 2023, **454**, 140385.
- 4 L. Wang, X. Yin, C. Jin, C. Lai, G. Qu and G. W. Zheng, *ACS Appl. Energy Mater.*, 2020, **3**, 11540-11547.
- 5 J. Sheng, Q. Zhang, C. Sun, J. Wang, X. Zhong, B. Chen, C. Li, R. Gao, Z. Han and G. Zhou, *Adv. Funct. Mater.*, 2022, **32**, 2203272.
- 6 X. Gao, X. Zheng, J. Wang, Z. Zhang, X. Xiao, J. Wan, Y. Ye, L. Y. Chou, H. K. Lee, J. Wang, R. A. Vila, Y. Yang, P. Zhang, L. W. Wang and Y. Cui, *Nano Lett.*, 2020, **20**, 5496-5503.
- 7 X. Gao, X. Zheng, Y. Tsao, P. Zhang, X. Xiao, Y. Ye, J. Li, Y. Yang, R. Xu, Z. Bao and Y. Cui, *J. Am. Chem. Soc.*, 2021, **143**, 18188-18195.
- 8 Y. Liu, H. Liu, Y. Lin, Y. Zhao, H. Yuan, Y. Su, J. Zhang, S. Ren, H. Fan and Y. Zhang, *Adv. Funct. Mater.*, 2021, **31**, 2104863.
- 9 Y.-X. Song, Y. Shi, J. Wan, S.-Y. Lang, X.-C. Hu, H.-J. Yan, B. Liu, Y.-G. Guo, R. Wen and L.-J. Wan, *Energy Environ. Sci.*, 2019, **12**, 2496-2506.
- 10 Y. An, Y. Cheng, S. Wang and J. Yu, *ACS Appl. Energy Mater.*, 2022, **5**, 2786-2794.
